# Supplementary material
Source: publisher figshare collection journal article supplement (https://geolsoc.figshare.com/articles/dataset/_/3453500)
Supplement: Supplementary file 1 [file 1]

K-S P-values using error in the CDF

Table with 29 columns and 64 rows of data. Headers include geological units (WD1, WD3, WD4, CHD2, CHD3, SQ1, SQ2) and various sample identifiers (e.g., basement: Jarva Brick Group, Frické (Kinyv) riendi et al Group). The table contains numerical p-values for each comparison, with many cells containing values like 0.000, 0.001, 0.002, etc.
